# Supplementary material for: Risk Factors for MERS-CoV Seropositivity among Animal Market and Slaughterhouse Workers, Abu Dhabi, United Arab Emirates, 2014–2017
Source: PubMed Central journal article supplement (PMC6478233; doi:10.3201/eid2505.181728), 2019-05
Supplement: 18-1728-Techapp-s1.pdf [file 18-1728-Techapp-s1.pdf]

# Risk Factors for MERS-CoV Seropositivity among Animal Market and Slaughterhouse Workers, Abu Dhabi, United Arab Emirates, 2014–2017

## Appendix 1

### Market and Slaughterhouse Worker Surveys

#### Market Worker Survey

|                                                  |
|--------------------------------------------------|
| Form Serial Number: ER/BW/_____/16               |
| Interview Date: ____/____/____<br>Day Month Year |
| Interviewer initials: ____                       |

|                                                       |                                                                                           |
|-------------------------------------------------------|-------------------------------------------------------------------------------------------|
| Name of the animal market _____                       |                                                                                           |
| Location of the animal market (region and city) _____ |                                                                                           |
| <b><u>Subject Information</u></b>                     |                                                                                           |
| FIRST NAME _____ LAST NAME _____                      |                                                                                           |
| AGE (years)                                           | <i>GENDER</i> <input type="checkbox"/> <i>Male</i> <input type="checkbox"/> <i>Female</i> |
| D.O.B: dd/mm/yyyy                                     | <i>NATIONALITY</i> _____                                                                  |

**CONSENTED**

YES       NO

**BLOOD SPECIMEN COLLECTED**

YES       NO

**Specimen collection date:**

\_\_\_\_/\_\_\_\_/\_\_\_\_  
Day      Month      Year

Investigator Notes:

Sample Label:  
*(Place sticker here)*

Home phone \_\_\_\_\_ Mobile phone 1 \_\_\_\_\_

Mobile phone 2 \_\_\_\_\_

**CURRENT HOME ADDRESS**

Street \_\_\_\_\_

City \_\_\_\_\_ Area: \_\_\_\_\_

**INTERNAL USE:**

**Data Entered:**  
**Initials:**

**Data Entry Checked:**  
**Initials:**

**OCCUPATION**

What is your job title at the animal market? \_\_\_\_\_

Do you have animals at your home?  **YES**  **NO**

If YES, specify type and number of animals at home: \_\_\_\_\_

How long have you worked at this animal market? \_\_\_\_\_years \_\_\_\_\_months

If less than one year, have you worked at any other animal markets prior to this one?

**YES** (specify location, number, or name of the animal market) \_\_\_\_\_

**NO**

How many hours per week do you typically work at the animal market? \_\_\_\_\_hours/week

How many hours per week do you typically work with animals outside the animal market?  
\_\_\_\_\_ hours/week

Do you currently hold other jobs aside from working at the animal market?  **YES**  **NO**

If YES, Please specify location and job title of other job(s): \_\_\_\_\_

How often do you perform each of the following?

- |                                          |                                       |                                           |                                       |
|------------------------------------------|---------------------------------------|-------------------------------------------|---------------------------------------|
| Handle camels                            | <input type="checkbox"/> <b>NEVER</b> | <input type="checkbox"/> <b>SOMETIMES</b> | <input type="checkbox"/> <b>DAILY</b> |
| Feed camels                              | <input type="checkbox"/> <b>NEVER</b> | <input type="checkbox"/> <b>SOMETIMES</b> | <input type="checkbox"/> <b>DAILY</b> |
| Clean camels                             | <input type="checkbox"/> <b>NEVER</b> | <input type="checkbox"/> <b>SOMETIMES</b> | <input type="checkbox"/> <b>DAILY</b> |
| Clean camel housing                      | <input type="checkbox"/> <b>NEVER</b> | <input type="checkbox"/> <b>SOMETIMES</b> | <input type="checkbox"/> <b>DAILY</b> |
| Handle or dispose camel waste            | <input type="checkbox"/> <b>NEVER</b> | <input type="checkbox"/> <b>SOMETIMES</b> | <input type="checkbox"/> <b>DAILY</b> |
| Clean equipment                          | <input type="checkbox"/> <b>NEVER</b> | <input type="checkbox"/> <b>SOMETIMES</b> | <input type="checkbox"/> <b>DAILY</b> |
| Milk camels                              | <input type="checkbox"/> <b>NEVER</b> | <input type="checkbox"/> <b>SOMETIMES</b> | <input type="checkbox"/> <b>DAILY</b> |
| Slaughter camels                         | <input type="checkbox"/> <b>NEVER</b> | <input type="checkbox"/> <b>SOMETIMES</b> | <input type="checkbox"/> <b>DAILY</b> |
| Assist with camel parturition (birthing) | <input type="checkbox"/> <b>NEVER</b> | <input type="checkbox"/> <b>SOMETIMES</b> | <input type="checkbox"/> <b>DAILY</b> |
| Give medications/vaccines to camels      | <input type="checkbox"/> <b>NEVER</b> | <input type="checkbox"/> <b>SOMETIMES</b> | <input type="checkbox"/> <b>DAILY</b> |

Other tasks (specify and indicate frequency):

## ANIMAL EXPOSURES

In the past 12 months, have you had direct physical contact with any animals or their waste?

- |         |                                |                                 |                                  |                                 |                                |
|---------|--------------------------------|---------------------------------|----------------------------------|---------------------------------|--------------------------------|
| Camels  | <input type="checkbox"/> Never | <input type="checkbox"/> Rarely | <input type="checkbox"/> Monthly | <input type="checkbox"/> Weekly | <input type="checkbox"/> DAILY |
| Goats   | <input type="checkbox"/> Never | <input type="checkbox"/> Rarely | <input type="checkbox"/> Monthly | <input type="checkbox"/> Weekly | <input type="checkbox"/> DAILY |
| Sheep   | <input type="checkbox"/> Never | <input type="checkbox"/> Rarely | <input type="checkbox"/> Monthly | <input type="checkbox"/> Weekly | <input type="checkbox"/> DAILY |
| Cattle  | <input type="checkbox"/> Never | <input type="checkbox"/> Rarely | <input type="checkbox"/> Monthly | <input type="checkbox"/> Weekly | <input type="checkbox"/> DAILY |
| Horses  | <input type="checkbox"/> Never | <input type="checkbox"/> Rarely | <input type="checkbox"/> Monthly | <input type="checkbox"/> Weekly | <input type="checkbox"/> DAILY |
| Dogs    | <input type="checkbox"/> Never | <input type="checkbox"/> Rarely | <input type="checkbox"/> Monthly | <input type="checkbox"/> Weekly | <input type="checkbox"/> DAILY |
| Cats    | <input type="checkbox"/> Never | <input type="checkbox"/> Rarely | <input type="checkbox"/> Monthly | <input type="checkbox"/> Weekly | <input type="checkbox"/> DAILY |
| Bats    | <input type="checkbox"/> Never | <input type="checkbox"/> Rarely | <input type="checkbox"/> Monthly | <input type="checkbox"/> Weekly | <input type="checkbox"/> DAILY |
| Rodents | <input type="checkbox"/> Never | <input type="checkbox"/> Rarely | <input type="checkbox"/> Monthly | <input type="checkbox"/> Weekly | <input type="checkbox"/> DAILY |
| Birds   | <input type="checkbox"/> Never | <input type="checkbox"/> Rarely | <input type="checkbox"/> Monthly | <input type="checkbox"/> Weekly | <input type="checkbox"/> DAILY |

Other animals (specify and indicate frequency):

Were any of the animals you had contact with ill?  YES  NO  Do not recall

If YES, please describe the following:

Which animals were ill? \_\_\_\_\_

What were their symptoms? \_\_\_\_\_

Did you develop any illness after this contact with the ill animal?  YES  NO

If YES, what were your symptoms? \_\_\_\_\_

AND how long after this contact did your symptoms begin?

<1 Week  1-2 Weeks  3-4 Weeks  >1 Month

In the past 12 months, have you eaten any raw camel milk or milk products?

YES  NO  Do not recall

In the past 12 months, have you drunk camel urine?

YES  NO  Do not recall

In the past 12 months, have you eaten uncooked camel meat?

YES  NO  Do not recall

## PPE and HYGIENE

Do you usually wear personal protective equipment (PPE) when handling animals or their waste?

YES  NO

If YES, check all that apply:

Gloves  Dust Mask  Respirator  Coveralls  Boots or boot covers

Eye protection (goggles, safety glasses)  Other (specify):

Do you take your work clothes home with you?  YES  NO

Where are your work clothes washed?  Home  Work place  Other (specify)

Who washes your work clothes?  Self  Household member  Other worker

At which of the following times do you usually wash your hands at the animal market (check all that apply)?

Before and after each animal-related task

At meal times

At bathroom times

At prayer times

At the beginning and end of the day

Where do you wash your hands at the animal market? \_\_\_\_\_

### TRAVEL HISTORY

During the last 12 months, did you visit:  YES  NO  do not recall

If yes, check all that apply:

Bahrain  Palestinian Territories  Lebanon

Iraq  Qatar  Yemen

Iran  Saudi Arabia  Oman

Israel  Syria  Jordan

Kuwait  South Korea  Other

(list) \_\_\_\_\_

Did you travel within United Arab Emirates?  YES  NO

If YES, where? \_\_\_\_\_

### ILLNESS HISTORY

During the last 12 months, have you seen a doctor for a respiratory illness? (for symptoms including any of the following: cough, fever, runny nose, shortness of breath, rapid or shallow breathing, sore throat, vomiting after cough, and wheezing):

**YES**     **NO**     **Do not recall**

If YES...

Where did you seek care for this illness (name/location of medical institution)?

\_\_\_\_\_

Can you describe your symptoms during this time?

\_\_\_\_\_

What medications did you take during this time?

\_\_\_\_\_

Was a chest x-ray performed?

**YES**     **NO**     **Do not recall**

If YES,

Health insurance card number \_\_\_\_\_

Medical record number \_\_\_\_\_

Do you have any underlying medical conditions (e.g. immunocompromised, heart disease, pulmonary disease (COPD, emphysema, cancer, diabetes, hypertension, smoking, etc.)?)

**YES**     **NO**

If YES, please describe \_\_\_\_\_

### **HUMAN EXPOSURES**

Did you have contact with anyone hospitalized for respiratory illness during the last 12 months?

**YES**     **NO**     **Do not recall**

**ADDITIONAL NOTES:**

\_\_\_\_\_



## ANIMAL EXPOSURES

In the past 12 months, have you had direct physical contact with any animals or their waste?

- |         |                                |                                 |                                  |                                 |                                |
|---------|--------------------------------|---------------------------------|----------------------------------|---------------------------------|--------------------------------|
| Camels  | <input type="checkbox"/> Never | <input type="checkbox"/> Rarely | <input type="checkbox"/> Monthly | <input type="checkbox"/> Weekly | <input type="checkbox"/> DAILY |
| Goats   | <input type="checkbox"/> Never | <input type="checkbox"/> Rarely | <input type="checkbox"/> Monthly | <input type="checkbox"/> Weekly | <input type="checkbox"/> DAILY |
| Sheep   | <input type="checkbox"/> Never | <input type="checkbox"/> Rarely | <input type="checkbox"/> Monthly | <input type="checkbox"/> Weekly | <input type="checkbox"/> DAILY |
| Cattle  | <input type="checkbox"/> Never | <input type="checkbox"/> Rarely | <input type="checkbox"/> Monthly | <input type="checkbox"/> Weekly | <input type="checkbox"/> DAILY |
| Horses  | <input type="checkbox"/> Never | <input type="checkbox"/> Rarely | <input type="checkbox"/> Monthly | <input type="checkbox"/> Weekly | <input type="checkbox"/> DAILY |
| Dogs    | <input type="checkbox"/> Never | <input type="checkbox"/> Rarely | <input type="checkbox"/> Monthly | <input type="checkbox"/> Weekly | <input type="checkbox"/> DAILY |
| Cats    | <input type="checkbox"/> Never | <input type="checkbox"/> Rarely | <input type="checkbox"/> Monthly | <input type="checkbox"/> Weekly | <input type="checkbox"/> DAILY |
| Bats    | <input type="checkbox"/> Never | <input type="checkbox"/> Rarely | <input type="checkbox"/> Monthly | <input type="checkbox"/> Weekly | <input type="checkbox"/> DAILY |
| Rodents | <input type="checkbox"/> Never | <input type="checkbox"/> Rarely | <input type="checkbox"/> Monthly | <input type="checkbox"/> Weekly | <input type="checkbox"/> DAILY |
| Birds   | <input type="checkbox"/> Never | <input type="checkbox"/> Rarely | <input type="checkbox"/> Monthly | <input type="checkbox"/> Weekly | <input type="checkbox"/> DAILY |

Other animals (specify and indicate frequency):

Were any of the animals you had contact with ill?  YES  NO  Do not recall

If YES, please describe the following:

Which animals were ill? \_\_\_\_\_

What were their symptoms? \_\_\_\_\_

Did you develop any illness after this contact with the ill animal?  YES  NO

If YES, what were your symptoms? \_\_\_\_\_

AND how long after this contact did your symptoms begin?

<1 Week  1-2 Weeks  3-4 Weeks  >1 Month

In the past 12 months, have you eaten any raw camel milk or milk products?

YES  NO  Do not recall

In the past 12 months, have you drunk camel urine?

YES  NO  Do not recall

In the past 12 months, have you eaten uncooked camel meat?

YES  NO  Do not recall

## PPE and HYGIENE

Do you usually wear personal protective equipment (PPE) when handling animals or their waste?

YES       NO

If YES, check all that apply:

Gloves       Dust Mask       Respirator       Coveralls       Boots or boot covers

Eye protection (goggles, safety glasses)       Other (specify):

Do you take your work clothes home with you?  YES       NO

Where are your work clothes washed?  Home       Work place       Other (specify)

Who washes your work clothes?  Self       Household member       Other worker

At which of the following times do you usually wash your hands at the slaughter house (check all that apply)?

Before and after each animal-related task

At meal times

At bathroom times

At prayer times

At the beginning and end of the day

Where do you wash your hands at the slaughter house? \_\_\_\_\_

### TRAVEL HISTORY

During the last 12 months, did you visit:  YES       NO       do not recall

If yes, check all that apply:

Bahrain       Palestinian Territories       Lebanon

Iraq       Qatar       Yemen

Iran       Saudi Arabia       Oman

Israel       Syria       Jordan

Kuwait       South Korea       Other

(list) \_\_\_\_\_

Did you travel within United Arab Emirates?  YES       NO

If YES, where? \_\_\_\_\_

### ILLNESS HISTORY

During the last 12 months, have you seen a doctor for a respiratory illness? (for symptoms including any of the following: cough, fever, runny nose, shortness of breath, rapid or shallow breathing, sore throat, vomiting after cough, and wheezing):

**YES**     **NO**     **Do not recall**

If YES...

Where did you seek care for this illness (name/location of medical institution)?

\_\_\_\_\_

Can you describe your symptoms during this time?

\_\_\_\_\_

What medications did you take during this time?

\_\_\_\_\_

Was a chest x-ray performed?

**YES**     **NO**     **Do not recall**

If YES,

Health insurance card number \_\_\_\_\_

Medical record number \_\_\_\_\_

Do you have any underlying medical conditions (e.g. immunocompromised, heart disease, pulmonary disease (COPD, emphysema, cancer, diabetes, hypertension, smoking, etc.)?)

**YES**     **NO**

If YES, please describe \_\_\_\_\_

### **HUMAN EXPOSURES**

Did you have contact with anyone hospitalized for respiratory illness during the last 12 months?

**YES**     **NO**     **Do not recall**

**ADDITIONAL NOTES:**

\_\_\_\_\_
